# Supplementary material for: Evaluating platelet activation related to the degradation products of biomaterials using molecular markers
Source: Royal Society of Chemistry journal article supplement (doi:10.1039/d0tb01685c), 2020-01-01
Supplement: d0tb01685c1.pdf [file d0tb01685c1.pdf]

Supplementary Information

**Evaluating Platelet Activation Related to the Degradation Products of  
Biomaterials Using Molecular Markers**

Sheng Ye<sup>a</sup>, Panxianzhi Ni<sup>a</sup>, Hong Wang<sup>b</sup>, Tun Yuan<sup>a,\*</sup>, Jie Liang<sup>a,\*</sup>,

Yujiang Fan<sup>a</sup>, Xingdong Zhang<sup>a</sup>

<sup>a</sup> National Engineering Research Center for Biomaterials, Sichuan University, Chengdu  
610064, P. R. China

<sup>b</sup> Institute of Blood Transfusion, Chinese Academy of Medical Science & Peking Union  
Medical College, Chengdu, Sichuan, China.

\* Corresponding authors

E-mail addresses: Stalight@163.com (T. Y.), Jie\_188@126.com (J. L.)

**This part is the result of platelet activation of the negative control material polyethylene.**

It can be seen from Fig. 1 that after the polyethylene degradation products are in contact with rabbit blood, the concentration of the molecular markers has not changed significantly compared with the blank control.

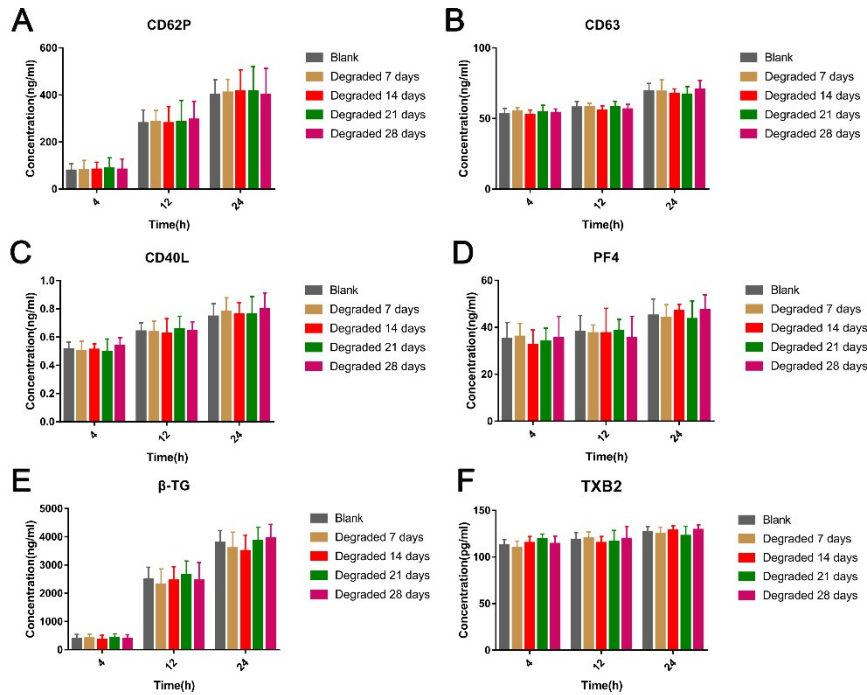

**Fig.S1.** Platelet activation assessed in degradation products of polyethylene at different degradation times by measurements of molecular markers (CD62P, CD63, CD40L, PF4, β-TG, and TXB2). (A) to (F) CD62P, CD63, CD40L, PF4, β-TG, and TXB2 concentration, respectively. Data expressed as mean ± S.E.; n = 9 with samples exposed to blood from three different rabbits and three distinct samples for each rabbit. \* P < 0.05.

**This part is the process of preparing and storing plasma.**

Prepare plasma by centrifugation according to the instructions in the kit instructions

1. Centrifuge samples 4 °C for 20 minutes at 2000×g, then centrifuge the separated plasma at 4 °C for 10 minutes at 10000×g, and the supernatant was taken.
2. Diluting the plasma according to the instructions in the kit, and the plasma was diluted by 0.01mol/L PBS (PH=7.0-7.2). Transfer the diluted plasma to a 0.5ml sterile enzyme-free EP tube and store at -80 °C.

**Details of the kits used in the study in Table 1.**

**Table 1** Details of the kits in the study

| Kits                                                   | Serial number | Dilution factor | Diluents |
|--------------------------------------------------------|---------------|-----------------|----------|
| P-Selectin (CD62P)                                     | SEA569Rb      | 10              | PBS      |
| Tetraspanin 30 Cluster of<br>Differentiation 63 (CD63) | SEB345Rb      | 10              | PBS      |
| Cluster of Differentiation<br>40 Ligand (CD40L)        | SEA119Rb      | 10              | PBS      |
| Platelet factor 4 (PF4)                                | SEA172Rb      | 10              | PBS      |
| Beta-thromboglobulin<br>(β-TG)                         | SEA370Rb      | 500             | PBS      |
| Thromboxane B2 (TXB2)                                  | CEA877Ge      | Not diluted     | PBS      |

“Rb” represents rabbit, and “Ge” represents pan-species (General). The PBS in the table is 0.01 mol/L Phosphate Buffer Solution (PH=7.0-7.2).
